# Supplementary material for: Conversion of chitin and N-acetyl-d-glucosamine into a N-containing furan derivative in ionic liquids
Source: Royal Society of Chemistry journal article supplement (doi:10.1039/c5ra00382b), 2015-01-01
Supplement: c5ra00382b1.pdf [file c5ra00382b1.pdf]

## Supplementary Information

### Conversion of Chitin and N-Acetyl-D-Glucosamine into a N-containing Furan Derivative in Ionic Liquids

Xi Chen,<sup>a</sup> Yi Liu,<sup>b</sup> Francesca M. Kerton,<sup>b,\*</sup> and Ning Yan<sup>a,\*</sup>

<sup>a</sup> Department of Chemical and Biomolecular Engineering, National University of Singapore, 4 Engineering Drive 4, 117585, Singapore. E-mail: ning.yan@nus.edu.sg

<sup>b</sup> Department of Chemistry, Memorial University of Newfoundland, St. John's, NL, A1B 3X7, Canada. E-mail: fkerton@mun.ca

#### Content

**Figure S1** Comparison of 3A5AF yields by using different additives

**Figure S2** Effect of chitin concentration on 3A5AF yield

**Figure S3** Effect of boric acid amount on 3A5AF yield

**Figure S4** Effect of HCl amount on 3A5AF yield

**Table S1** Recycling results of [BMIm]Cl for chitin dehydration

**Figure S5** Effect of temperature on 3A5AF yield

**Table S2** EA analysis results of chitin and recovered solids

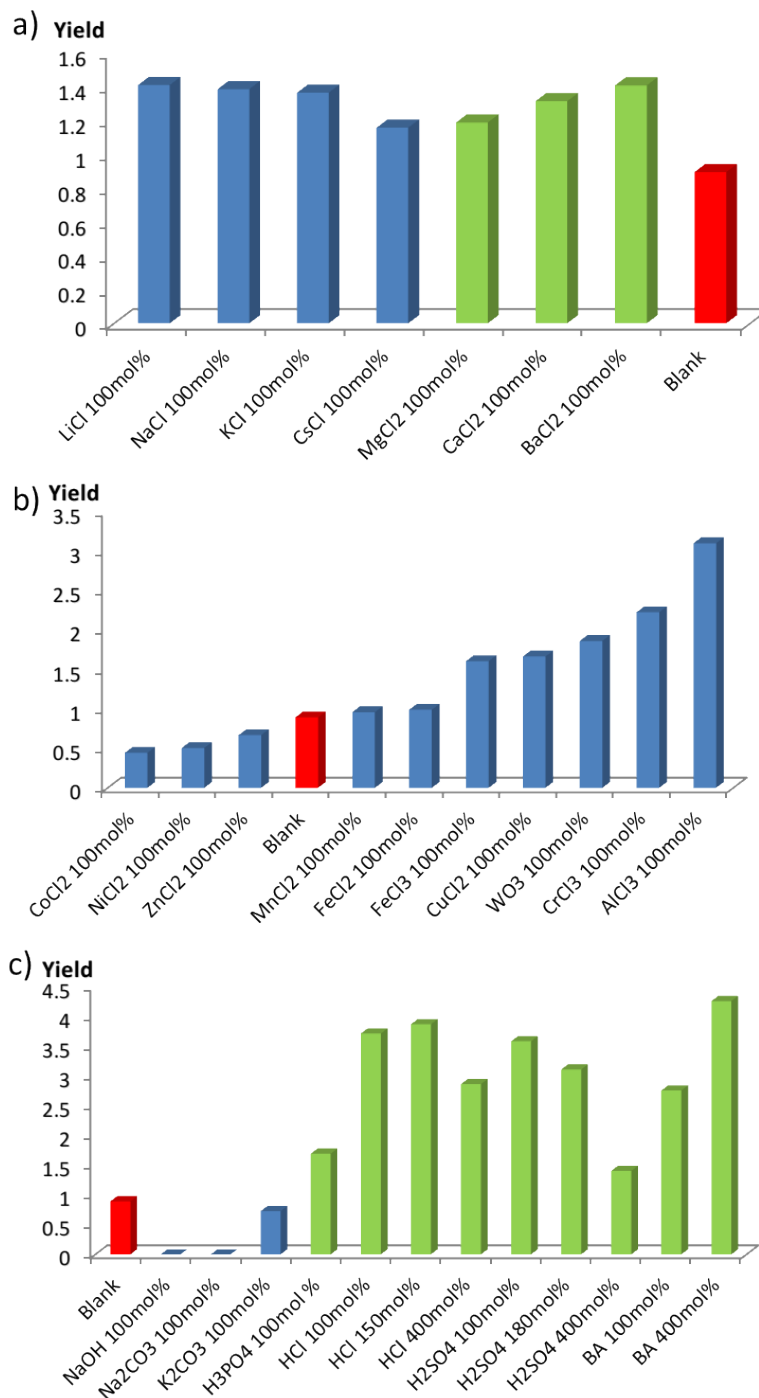

Figure S1 Comparison of yield of 3A5AF by using various additives: a) Group I and group II metal chlorides; b) Other metal salts and oxides; c) Alkalis and acids. Reaction conditions: 180 °C, [BMIm]Cl (1 g), chitin (80 mg), single additive (100 mol%), 1 h.

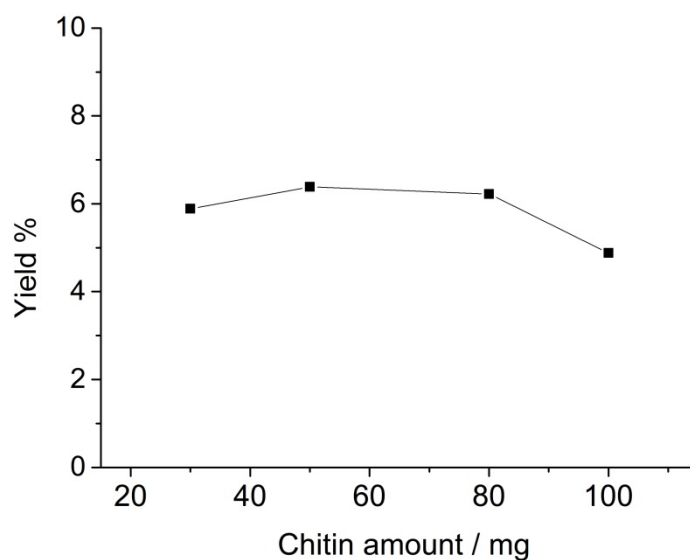

Figure S2 Effect of chitin concentration on yield of 3A5AF. Reaction conditions: 180 °C, [BMIm]Cl (1 g), 400 mol% boric acid and 100 mol% HCl, 1 h.

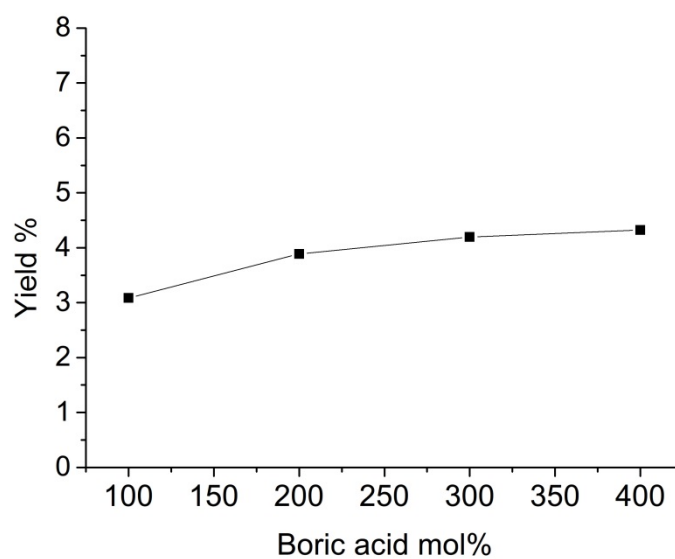

Figure S3 Effect of boric acid amount on yield of 3A5AF. Reaction conditions: 180 °C, [BMIm]Cl (1 g) and chitin (80 mg), 1 h.

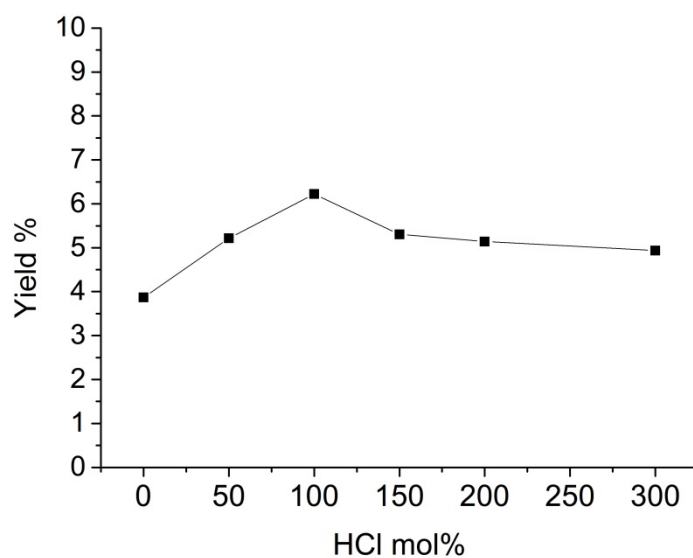

Figure S4 Effect of HCl amount on yield of 3A5AF. Reaction conditions: 180 °C, [BMIm]Cl (1 g), chitin (80 mg) and 400 mol% boric acid, 1 h.

Table S1 Recycling results of [BMIm]Cl for chitin dehydration

| Entry     | 1 <sup>st</sup> run | 2 <sup>nd</sup> run | 3 <sup>rd</sup> run |
|-----------|---------------------|---------------------|---------------------|
| Yield / % | 3.3                 | 3.6                 | 3.4                 |

Reaction conditions: chitin (80 mg), IL (1 g), boric acid (400 mol%), 180 °C, 40 min.

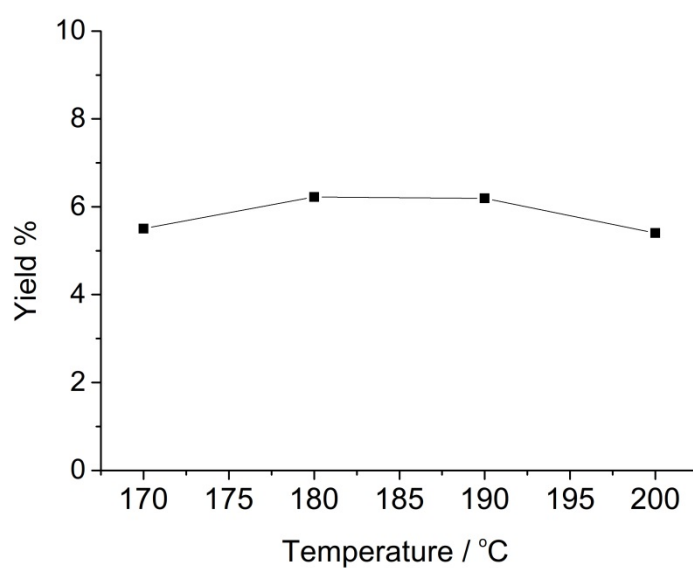

Figure S5 Effect of temperature on yield of 3A5AF. Reaction conditions: [BMIm]Cl (1 g), chitin (80 mg), 400 mol% boric acid and 100 mol% HCl, 1 h.

Table S2 EA analysis results of pure chitin and recovered solid

| Sample           | C wt% | H wt% | N wt% |
|------------------|-------|-------|-------|
| Pure chitin      | 47.24 | 6.40  | 6.89  |
| Recovered chitin | 46.56 | 5.40  | 6.35  |
